# Supplementary material
Source: Springer Nature journal article supplement (https://www.springermedizin.de/resource/supplementary/12885_2013_4236_MOESM1_ESM.pdf/9466764)

Number of axillary lymph nodes

40  
30  
20  
10  
0

Primary (neoadjuvant) chemotherapy group

Primary surgery group

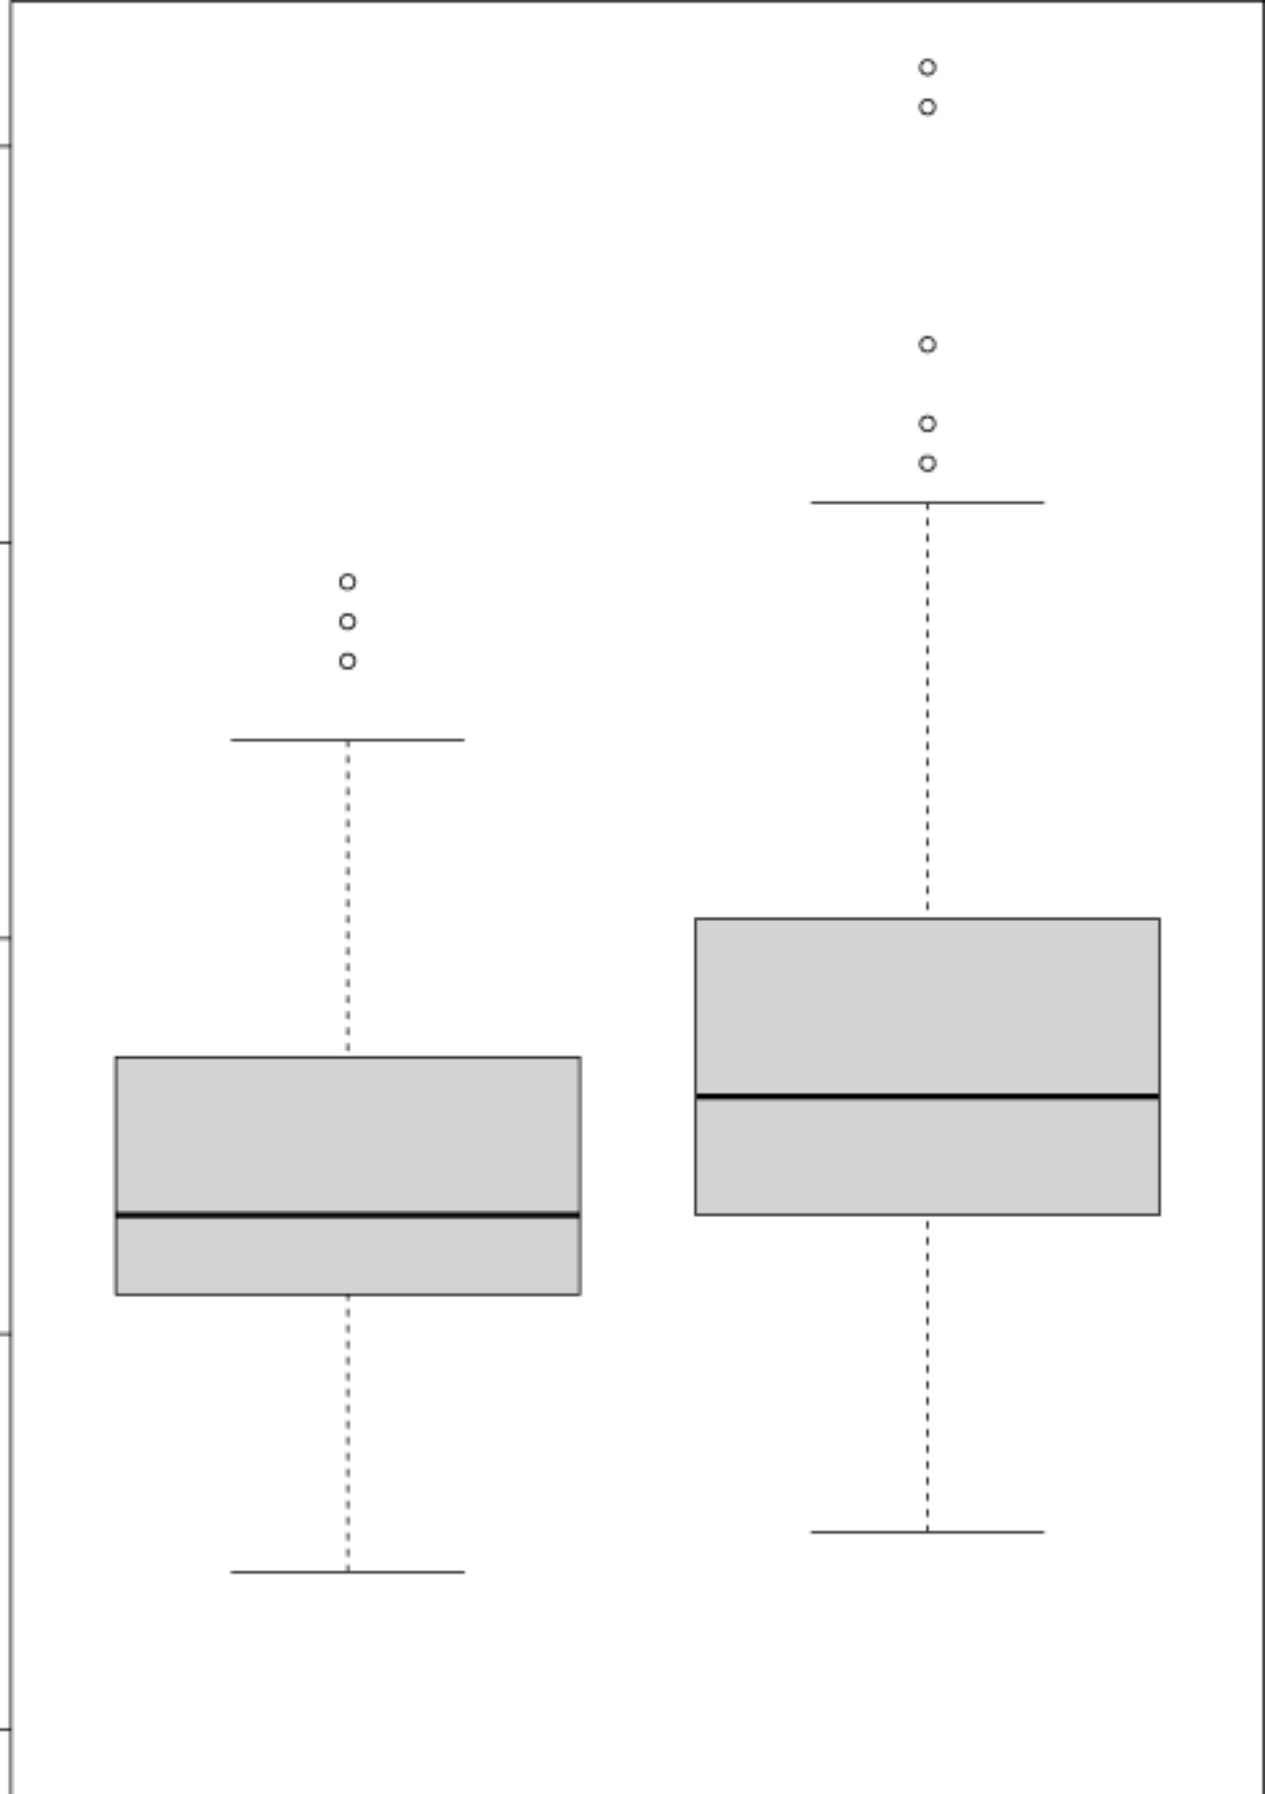

Supplement: MOESM1 [file 9466764]
